# Supplementary material
Source: ML conference proceedings conference paper supplement (https://openaccess.thecvf.com/content/CVPR_2019/html/Sattler_Understanding_the_Limitations_CVPR_2019_paper.html)
Supplement: Supplementary file 2 [file Sattler_Understanding_the_Limitations_CVPR_2019_supplemental.zip]

Archive with 8 entries (5 files):
- 1887-supp/
- 1887-supp/.DS_Store
- __MACOSX/
- __MACOSX/1887-supp/
- __MACOSX/1887-supp/._.DS_Store
- 1887-supp/understanding-video.mp4
- __MACOSX/1887-supp/._understanding-video.mp4
- 1887-supp/understanding-supp.pdf
